# Supplementary material for: Should We Always Perform Preoperative Chest Computed Tomography in Patients with cT1a Renal Cell Carcinoma?
Source: MDPI journal article supplement (doi:10.3390/cancers14225558), 2022-11-12
Supplement: s1 [file s1]

**Table S1.** Definition of systemic symptoms.

| <b>Systemic symptoms</b> |
|--------------------------|
| Fever or chills          |
| Weight loss              |
| Sweat                    |
| Hypertension             |
| Cachexia                 |
| Dyspnea                  |
| Pain                     |
| Anorexia                 |
